# Supplementary material for: Etudes de la convergence d'un calcul Monte Carlo de criticité : utilisation d'un calcul déterministe et détection automatisée du transitoire
Source: Royal Society of Chemistry journal article supplement (doi:10.1039/c0em00473a), 2012-12-03
Supplement: c0em00473a.pdf [file c0em00473a.pdf]

1 **Supplementary information**

2  
3 Estrogenic activity profiles and risks in surface water and sediments of the  
4 Pearl River system, South China, assessed by chemical analysis and *in vitro*  
5 bioassay

6  
7 **Jian-Liang Zhao, Guang-Guo Ying \*, Feng Chen, You-Sheng Liu, Li Wang, Bin Yang,**  
8 **Shan Liu, Ran Tao**

9  
10 State Key Laboratory of Organic Geochemistry, Guangzhou Institute of Geochemistry, Chinese  
11 Academy of Sciences, Guangzhou 510640, P R China

12  
13 \* Corresponding author. Tel.:+86 020 85290200; fax: +86 020 85290200. Email address:  
14 guangguo.ying@gmail.com (GG Ying)

15

## 16 **Quality control and quality assurance**

17 Recoveries in river water were obtained by spiking 1 L of reservoir water with 5, 100, and  
18 200 ng of seven selected phenolic compounds, while recoveries in sediments were obtained by  
19 adding 20, 100, and 500 ng of each compound to 5 g of reservoir sediment. The recoveries in  
20 river water for 4-t-OP, 4-NP, BPA, E1, DES and EE2 were between 70%-120% at three spiked  
21 concentrations, but E2 had slightly higher recoveries. The limits of detection (LODs) and the  
22 limits of quantitation (LOQs) for analytes in river water were defined as 3 and 10 times the  
23 standard deviation (SD) of 7 spiked samples at 5 ng/L respectively. LODs were below 1 ng/L and  
24 LOQs were below 2 ng/L for most compounds, except for 4-NP which had a higher LOD and  
25 LOQ. While the recoveries in sediments were between 70%-120% for most compounds, and the  
26 LODs and LOQs were below 1.0 ng/g and 3.0 ng/g for most compounds, the LOD and LOQ of  
27 4-NP were 1.5 ng/g and 4.9 ng/g, respectively. Detailed recoveries, LODs and LOQs data are  
28 available in [Table S2](#).

29 As a quality control, duplicate blank samples and duplicate spiked control samples were  
30 analysed simultaneously with the unspiked field samples. Spiked control samples for river water  
31 and reservoir sediment were obtained by spiking 1 L of Milli-Q water with 100 ng of each  
32 compound, and spiking 5 g of reservoir sediment with 100 ng of each compound. The recoveries  
33 for target compounds in the control samples were between 70% -120% in each batch of  
34 experiments. For the YES bioassay, spiked control samples were obtained by spiking 1 L of  
35 Milli-Q water and 5 g of reservoir sediment with 54.48 ng of E2. The EEQs (estradiol equivalent)  
36 for the control samples in water and sediment were between 45 ng to 65 ng in each batch of YES  
37 (recombinant yeast estrogen screening) bioassay.

38

39

## 40 **Measured EEQ and calculated EEQ**

41 The calculation approaches for measured EEQs and calculated EEQs were developed from  
42 the published methods.<sup>1</sup> In brief, it was assumed that the real sample had the same dose-effect  
43 curve as E2; hence it shared the same dose-effect equation as E2. The dose-effect curve of E2 is  
44 expressed as the arithmetic means with standard derivations of corrected absorbance data (blank  
45 value was subtracted) toward Logarithm of dose (equivalent amount at ng/L). The dose-effect  
46 equation of E2 was then fitted using log-logistic model. The equation is expressed as the  
47 following:

$$48 \quad Y = A_2 + \frac{(A_1 - A_2)}{1 + (x/EC_{50})^p}.$$

49 Here,  $Y$  is the corrected absorbance at 540 nm,  $A_1$  is the minimum absorbance,  $A_2$  is the  
50 maximum absorbance,  $EC_{50}$  is half dose-effect concentration, and  $p$  is the Hill slope. So, the  
51 measured EEQ a certain sample was calculated by using the ratio  $EC_{50}$  of the sample to  $EC_{50}$  of  
52 E2.

53 Based on the concentration addition model, calculated EEQ was expressed as the sum of all  
54 estrogenic contributions of seven compounds by multiplying their corresponding estradiol  
55 equivalency factors (EEFs) and chemical concentration.<sup>2</sup> Then, the EEFs of the target analytes  
56 are calculated by the ratios of  $EC_{50}$  values, that is  $EEF(i) = EC_{50}(i) / EC_{50}(E2)$ .<sup>1</sup> The EEFs for seven  
57 target compounds were listed in **Table S6**. The Calculated EEQ of real sample was the addition of  
58 values that all individual compound concentration multiplied the corresponding EEFs:

$$59 \quad \sum \text{Calculated EEQ}(i) = \sum \text{EEF}(i) \times c(i).$$

## 60 **Derivation of predict no effect concentration (PNEC) of E2**

61 The derivation of PNEC of E2 was carried out as the Technical Guidance Document (TGD)  
62 on risk assessment.<sup>3</sup> We collected no observed effect concentrations (NOECs), low observed  
63 effect concentrations (LOECs) data on the effects of reproduction and vitellogenin (VTG)  
64 concentration tests of fish, daphnia, and some other species in literature. The detailed data were  
65 summarized in **Table S4**. Here, we selected 77 *in vivo* chronic NOECs of reproduction data and  
66 set up the species sensitivity distribution curve (**Fig. S1**), and then fitted by the 4-parameter  
67 logistic regression. The parameters were shown in the following equation:

68 
$$y = -1.346 + \frac{97.17}{1 + (x/68.14)^{-0.6998}} .$$

69 From this distribution of species sensitivity distribution curve, the hazardous concentration  
70 ( $HC_5$ ) was identified as fifth percentage of all species tested,<sup>4,5</sup> behind which 95% of species  
71 would not display adverse effects associated with E2 exposure. The PNEC corresponding to the  
72  $HC_5$  was 1.5 ng/L for E2.

73

74 **References**

- 75 1 I. C. Beek, R. Bruhn and J. Gandrass, *Chemosphere*, 2006, **63**, 1870–1878.
- 76 2 K. L. Thorpe, M. Gross-Sorokin, I. Johnson, G. Brighty and C. R. Tyler, *Environ. Health*  
77 *Perspect.*, 2006, **114**, 90–97.
- 78 3 E.C., *Technical Guidance Document on Risk Assessment in support of Commissions*  
79 *Directive 93/67/EEC on Risk Assessment for new notified substances and Commissions*  
80 *Regulation (EC) No. 1488/94 on risk assessment for existing substances*, Ispra, Italy,  
81 European Chemicals Bureau, 1996.
- 82 4 M. C. Newman, D. R. Ownby, L. C. A. Mezin, D. C. Powell, T. R. L. Christensen, S. B.  
83 Lerberg and B. A. Anderson, *Environ. Toxicol. Chem.*, 2000, **19**, 508–515.
- 84 5 D. J. Caldwell, F. Mastrocco, T. H. Hutchinson, R. Lange, D. Heijerick, C. Janssen, P. D.  
85 Anderson and J. P. Sumpter, *Environ. Sci. Technol.*, 2008, **42**, 7046–7054.
- 86 6 H. R. Andersen, B. Halling-Sorensen and K. O. Kusk, *Ecotoxicol. Environ. Saf.*, 1999, **44**,  
87 56–61.
- 88 7 K. N. Baer and K. D. Owens, *Bull. Environ. Contam. Toxicol.*, 1999, **62**, 214–221.
- 89 8 L. B. Bjerregaard, C. Lindholst, B. Korsgaard and P. Bjerregaard, *Ecotoxicology*, 2008, **17**,  
90 252–263.
- 91 9 M. Breitholtz and B. E. Bengtsson, *Mar. Pollut. Bull.*, 2001, **42**, 879–886.
- 92 10 F. Brion, C. R. Tyler, X. Palazzi, B. Laillet, J. M. Porcher, J. Garric and P. Flammarion,  
93 *Aquat. Toxicol.*, 2004, **68**, 193–217.
- 94 11 J. Forget-Leray, I. Landriau, C. Minier and F. Leboulenger, *Ecotoxicol. Environ. Saf.*, 2005,  
95 **60**, 288–294.
- 96 12 N. Hirai, A. Nanba, M. Koshio, T. Kondo, M. Morita and N. Tatarazako, *Aquat. Toxicol.*,

- 97 2006, **79**, 288–295.
- 98 13 N. Hirai, A. Nanba, M. Koshio, T. Kondo, M. Morita and N. Tatarazako, *Aquat. Toxicol.*,  
99 2006, **77**, 78–86.
- 100 14 T. H. Hutchinson, N. A. Pounds, M. Hampel and T. D. Williams, *Sci. Total Environ.*, 1999,  
101 **233**, 167–179.
- 102 15 S. Imai, J. Koyama and K. Fujii, *Mar. Pollut. Bull.*, 2005, **51**, 708–714.
- 103 16 Y. X. Jin, R. J. Chen, L. W. Sun, H. F. Qian, W. P. Liu and Z. W. Fu, *Comp. Biochem.*  
104 *Physiol–C: Pharmacol. Toxicol. Endocrinol.*, 2009, **150**, 414–420.
- 105 17 J. A. Jukosky, M. C. Watzin and J. C. Leiter, *Bull. Environ. Contam. Toxicol.*, 2008, 81,  
106 230–235.
- 107 18 I. J. Kang, H. Yokota, Y. Oshima, Y. Tsuruda, T. Yamaguchi, M. Maeda, N. Imada, H.  
108 Tadokoro and T. Honjo, *Chemosphere*, 2002, **47**, 71–80.
- 109 19 D. R. Kashian and S. I. Dodson, *Environ. Toxicol. Chem.*, 2004, **23**, 1282–1288.
- 110 20 T. Liao, Q. L. Guo, S. W. Jin, W. Cheng and Y. Xu, *Fish Physiol. Biochem.*, 2009, **35**,  
111 341–349.
- 112 21 H. S. Marcial and A. *Fish Sci.*, 2007, **73**, 324–330.
- 113 22 C. D. Metcalfe, T. L. Metcalfe, Y. Kiparissis, B. G. Koenig, C. Khan, R. J. Hughes, T. R.  
114 Croley, R. E. March and T. Potter, *Environ. Toxicol. Chem.*, 2001, **20**, 297–308.
- 115 23 G. H. Panter, R. S. Thompson and J. P. Sumpter, *Aquat. Toxicol.*, 1998, **42**, 243–253.
- 116 24 B. L. Preston, T. W. Snell, T. L. Robertson and B. J. Dingmann, *Environ. Toxicol. Chem.*,  
117 2000, **19**, 2923–2928.
- 118 25 C. D. Robinson, E. Brown, J. A. Craft, I. M. Davies, C. Megginson, C. Miller and C. F.  
119 Moffat, *Aquat. Toxicol.*, 2007, **81**, 397–408.
- 120 26 M. Seki, S. Fujishima, T. Nozaka, M. Maeda and K. Kobayashi, *Environ. Toxicol. Chem.*,

121           2006, **25**, 2742–2752.

122   27 M. Seki, H. Yokota, M. Maeda and K. Kobayashi, *Environ. Toxicol. Chem.*, 2005, **24**,

123           1259–1266.

124   28 G. G. Ying and R. S. Kookana, *Environ. Sci. Technol.*, 2003, **37**, 1256–1260.

125   29 G. G. Ying, R. S. Kookana and Y. J. Ru, *Environ. Int.*, 2002, **28**, 545–551.

126

127 Fig. S1:

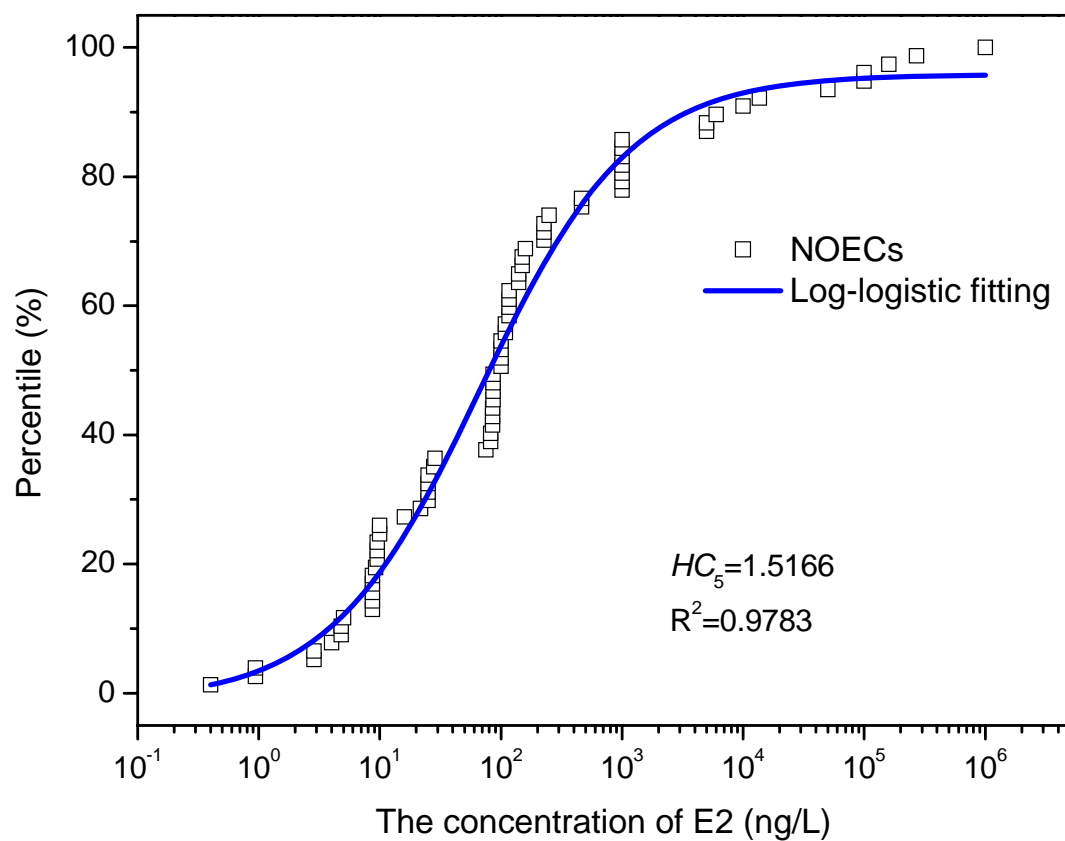

128

129 Fig S1. Estimating of predicted no-effect concentration (PNEC) from species sensitivity  
130 distribution (SSD) curve using *in vivo* predicted no-effect concentrationa (NOECs) data. The  
131 curve was fitted using log-logistic model.  $HC_5$  means 95% of species will not display adverse  
132 estrogenic effect below the concentration of E2.

133



134 **Table S1**

135 The surface water and sediment parameters of sampling sites.<sup>a</sup>

| Sites | T (°C) | pH   | Conductivity (µs/cm) | DO <sup>b</sup> (mg/L) | TOC <sub>dry</sub> <sup>c</sup> (%) | TOC <sub>wet</sub> <sup>d</sup> (%) |
|-------|--------|------|----------------------|------------------------|-------------------------------------|-------------------------------------|
| S0    | 31.1   | 7.27 | 86.7                 | 10.5                   | 1.23                                | 1.40                                |
| S1    | 31.0   | 7.45 | 112                  | 14.6                   | 2.61                                | 0.30                                |
| S2    | 31.1   | 7.24 | 166                  | 13.81                  | 0.90                                | 0.07                                |
| S3    | 30.2   | 6.92 | 257                  | 3.07                   | 2.46                                | 2.17                                |
| S4    | 31.1   | 7.03 | 343                  | 3.86                   | 3.95                                | 2.70                                |
| S5    | 31.2   | 7.10 | 383                  | 5.11                   | 3.26                                | 5.81                                |
| S6    | 32.8   | 7.14 | 446                  | 3.14                   | 2.95                                | 2.84                                |
| S7    | 30.6   | 7.16 | 340                  | 4.53                   | 2.40                                | 2.32                                |
| S8    | 30.8   | 7.33 | 230                  | 11.15                  | 1.44                                | 2.04                                |
| S9    | 32.4   | 7.31 | 325                  | 5.12                   | 1.91                                | 1.94                                |
| S10   | 31.9   | 7.28 | 266                  | 4.23                   | 2.82                                | 1.91                                |
| S11   | 31.3   | 7.10 | 360                  | 4.67                   | 6.01                                | 4.97                                |
| S12   | 30.9   | 7.26 | 675                  | 1.04                   | NA <sup>e</sup>                     | 3.80                                |
| S13   | 31.4   | 7.34 | 458                  | 2.14                   | 6.55                                | 2.79                                |
| S14   | 30.8   | 7.31 | 549                  | 0.99                   | 7.45                                | 3.18                                |
| R1    | 32.9   | 7.27 | 843                  | 0.33                   | NA                                  | 0.56                                |
| R2    | 32.9   | 7.09 | 720                  | 0.13                   | NA                                  | 6.24                                |
| W1    | 31.8   | 7.09 | 723                  | 6.82                   | NA                                  | NA                                  |
| W2    | 31.8   | 7.08 | 799                  | 6.81                   | NA                                  | NA                                  |
| W3    | 30.8   | 7.06 | 624                  | 7.93                   | NA                                  | NA                                  |
| W4    | 30.7   | 7.23 | 463                  | 3.42                   | NA                                  | NA                                  |

136 <sup>a</sup> The data of temperature, pH, conductivity and DO listed here were from the wet season  
137 (September 10-12, 2008); <sup>b</sup> Dissolved oxygen; <sup>c</sup> Total organic carbon of freeze-dried sediment in  
138 dry season; <sup>d</sup> Total organic carbon of freeze-dried sediment in wet season; <sup>e</sup> Not analyzed.  
139 R1 and R2 are two urban streams in the city area.

140

141 **Table S2**  
142 Recoveries (%), limit of detection and limit of quantitation of seven selected chemicals in surface  
143 water.

| Compounds <sup>a</sup> | Spiked concentrations <sup>b</sup> |          |          | LOD (ng/L) <sup>c</sup> | LOQ (ng/L) <sup>c</sup> |
|------------------------|------------------------------------|----------|----------|-------------------------|-------------------------|
|                        | 5 ng/L                             | 100 ng/L | 200 ng/L |                         |                         |
| 4-t-OP                 | 99±4                               | 75±4     | 74±11    | 0.3                     | 1.0                     |
| 4-NP                   | 92±22                              | 115±13   | 74±5     | 2.0                     | 7.0                     |
| BPA                    | 118±8                              | 103±1    | 105±3    | 0.7                     | 2.0                     |
| E1                     | 86±4                               | 96±5     | 90±8     | 0.2                     | 0.5                     |
| DES                    | 73±4                               | 71±3     | 71±2     | 0.2                     | 0.5                     |
| E2                     | 135±12                             | 145±5    | 163±34   | 0.3                     | 1.0                     |
| EE2                    | 131±4                              | 101±2    | 105±6    | 0.2                     | 0.7                     |

144 <sup>a</sup> 4-t-OP: 4-*tert*-octylphenol; 4-NP: 4-nonylphenol; BPA: bisphenol-A; E1: estrone; E2: estradiol;  
145 DES: diethylstilbestrol; EE2: 17 $\alpha$ -Ethinylestradiol.

146 <sup>b</sup> mean  $\pm$  standard deviation (n = 4).

147 <sup>c</sup> LOD: limit of detection; LOQ: limit of quantitation.

148

149 **Table S3**  
150 Recoveries (%), limit of detection and limit of quantitation of seven selected chemicals in  
151 sediments.

| Compounds <sup>a</sup> | Spiked concentrations <sup>b</sup> |         |          | LOD (ng/g) <sup>c</sup> | LOQ (ng/g) <sup>c</sup> |
|------------------------|------------------------------------|---------|----------|-------------------------|-------------------------|
|                        | 5 ng/g                             | 20 ng/g | 100 ng/g |                         |                         |
| 4-t-OP                 | 100±6                              | 80±3    | 75±3     | 0.3                     | 0.9                     |
| 4-NP                   | 81±12                              | 96±16   | 85±6     | 1.5                     | 4.9                     |
| BPA                    | 97±13                              | 88±2    | 89±1     | 0.8                     | 2.6                     |
| E1                     | 114±6                              | 91±7    | 95±2     | 0.3                     | 1.1                     |
| DES                    | 152±12                             | 133±12  | 134±7    | 0.7                     | 2.3                     |
| E2                     | 76±15                              | 83±18   | 106±14   | 1.1                     | 3.5                     |
| EE2                    | 89±9                               | 92±12   | 113±7    | 0.8                     | 2.5                     |

152 <sup>a</sup> 4-t-OP: 4-*tert*-octylphenol; 4-NP: 4-nonylphenol; BPA: bisphenol-A; E1: estrone; E2: estradiol;  
153 DES: diethylstilbestrol; EE2: 17 $\alpha$ -Ethinylestradiol.

154 <sup>b</sup> mean  $\pm$  standard deviation (n = 4).

155 <sup>c</sup> LOD: limit of detection; LOQ: limit of quantitation.

156

157 **Table S4**

158 List of available toxicity data from literature for 17 $\beta$ -estradiol (E2) on fish and other species.

| Groups                    | Test species            | Reproductive end point | Duration (days) | NOEC <sup>a</sup> (ng E2/L) | LOEC <sup>b</sup> (ng E2/L) | VTG NOEC <sup>c</sup> (ng E2/L) | Reference No. |
|---------------------------|-------------------------|------------------------|-----------------|-----------------------------|-----------------------------|---------------------------------|---------------|
| Copepod                   | <i>Acartia tonsa</i>    | Egg production         | 10              | 13600                       | 23000                       |                                 | 6             |
| Cladoceran                | <i>Daphnia magna</i>    | Reproduction           | 21              | 270000                      |                             |                                 | 7             |
| Brown trout               | <i>Salmo trutta</i>     | Sex ratio              | 274             | 10                          |                             |                                 | 8             |
| Copepod                   | <i>Nitocra spinipes</i> | Larval development     | 18              | 160000                      |                             |                                 | 9             |
| Copepod                   | <i>Nitocra spinipes</i> | Reproduction           | 18              | 50000                       |                             |                                 | 9             |
| Copepod                   | <i>Nitocra spinipes</i> | Sex ratio              | 18              | 5000                        | 50000                       |                                 | 9             |
| Female adult zebrafish    | <i>Danio rerio</i>      | Body length            | 21              | 4.8                         | 16.5                        |                                 | 10            |
| Female juvenile zebrafish | <i>Danio rerio</i>      | Body length            | 21              | 9.2                         | 21.6                        |                                 | 10            |
| Male adult zebrafish      | <i>Danio rerio</i>      | Body length            | 21              | >82                         |                             |                                 | 10            |
| Male juvenile zebrafish   | <i>Danio rerio</i>      | Body length            | 21              | >109                        |                             | 25                              | 10            |
| Female larval zebrafish   | <i>Danio rerio</i>      | Body length            | 21              | >117                        |                             |                                 | 10            |
| Male larval zebrafish     | <i>Danio rerio</i>      | Body length            | 21              | >117                        |                             |                                 | 10            |
| Female adult zebrafish    | <i>Danio rerio</i>      | Body weight            | 21              | 4.8                         | 16.5                        |                                 | 10            |
| Female juvenile zebrafish | <i>Danio rerio</i>      | Body weight            | 21              | 21.6                        | 109                         |                                 | 10            |
| Male adult zebrafish      | <i>Danio rerio</i>      | Body weight            | 21              | >82                         |                             | 5                               | 10            |
| Male juvenile zebrafish   | <i>Danio rerio</i>      | Body weight            | 21              | >109                        |                             |                                 | 10            |
| Female larval zebrafish   | <i>Danio rerio</i>      | Body weight            | 21              | >117                        |                             |                                 | 10            |

|                        |                           |                                     |     |         |       |      |  |    |
|------------------------|---------------------------|-------------------------------------|-----|---------|-------|------|--|----|
| Male larval zebrafish  | <i>Danio rerio</i>        | Body weight                         | 21  | >117    |       |      |  | 10 |
| Poppe                  | <i>Eurytemora affinis</i> | Survival                            | 10  | 6000    | 18000 |      |  | 11 |
| Female japanese medaka | <i>Oryzias latipes</i>    | Fecundity                           | 60  | 150     |       |      |  | 12 |
| Japanese medaka        | <i>Oryzias latipes</i>    | Spawn times                         | 60  | 150     |       | 100  |  | 12 |
| Japanese medaka        | <i>Oryzias latipes</i>    | Hatching rate                       | 14  | 140.6   |       |      |  | 13 |
| Japanese medaka        | <i>Oryzias latipes</i>    | Survival percentage of larvae       | 14  | 140.6   |       |      |  | 13 |
| Crustacean             | <i>Tisbe battagliai</i>   | Reproductive output                 | 21  | >100000 |       |      |  | 14 |
| Java-medaka            | <i>Oryzias javanicus</i>  | Fecundity                           | 187 | 9.5     | 16    |      |  | 15 |
| Java-medaka            | <i>Oryzias javanicus</i>  | Hepatosomatic index                 | 187 | 159     | 243   |      |  | 15 |
| Java-medaka            | <i>Oryzias javanicus</i>  | Reproduction                        | 180 | 9.5     | 16    | 16   |  | 15 |
| Java-medaka            | <i>Oryzias javanicus</i>  | The number of eggs                  | 187 | 16      | 68    |      |  | 15 |
| Java-medaka            | <i>Oryzias javanicus</i>  | Total length                        | 187 | 9.5     | 16    |      |  | 15 |
| Embryo zebrafish       | <i>Danio rerio</i>        | Expression of ER <sup>d</sup> alpha | 3   | 100     | 250   | 1000 |  | 16 |
| Larval zebrafish       | <i>Danio rerio</i>        | Expression of ER alpha              | 7   | 100     | 250   | 250  |  | 16 |
| Embryo zebrafish       | <i>Danio rerio</i>        | Expression of ER beta               | 3   | 1000    | >1000 |      |  | 16 |
| Larval zebrafish       | <i>Danio rerio</i>        | Expression of ER beta               | 7   | 1000    | >1000 |      |  | 16 |
| Male adult zebrafish   | <i>Danio rerio</i>        | Expression of hepatic ER beta       | 7   | 250     | 500   | 100  |  | 16 |
| Cladoceran             | <i>Ceriodaphnia dubia</i> | Neonates produced                   | 7   | 5000    | 50000 |      |  | 17 |
| Cladoceran             | <i>Ceriodaphnia dubia</i> | Survival                            | 7   | 1000000 |       |      |  | 17 |
| Japanese medaka        | <i>Oryzias latipes</i>    | Fertility of eggs                   | 21  | 227     | 463   | 29.3 |  | 18 |

|                        |                                |                              |                 |         |      |    |    |
|------------------------|--------------------------------|------------------------------|-----------------|---------|------|----|----|
| Male Japanese medaka   | <i>Oryzias latipes</i>         | GSI <sup>e</sup>             | 21              | 227     | 463  |    | 18 |
| Female Japanese medaka | <i>Oryzias latipes</i>         | Hatchability from F1 embryos | 21-31           | 463     | /    |    | 18 |
| Japanese medaka        | <i>Oryzias latipes</i>         | Sex ratios                   | 60              | >463    | /    |    | 18 |
| Japanese medaka        | <i>Oryzias latipes</i>         | Total number of eggs from F0 | 21              | 227     | 463  |    | 18 |
| Cladoceran             | <i>Daphnia magna</i>           | Reproduction                 | 25              | >100000 |      |    | 19 |
| Larval minnow          | <i>Gobiocypris rarus</i>       | Body weight                  | 21              | 25      | 100  | 25 | 20 |
| juvenile minnow        | <i>Gobiocypris rarus</i>       | Body weight                  | 42              | >1000   |      | 25 | 20 |
| Adult minnow           | <i>Gobiocypris rarus</i>       | Body weight                  | 171             | >1000   |      | 5  | 20 |
| Larval minnow          | <i>Gobiocypris rarus</i>       | Length                       | 21              | 25      | 100  |    | 20 |
| juvenile minnow        | <i>Gobiocypris rarus</i>       | Length                       | 42              | >1000   |      |    | 20 |
| Adult minnow           | <i>Gobiocypris rarus</i>       | Length                       | 171             | >1000   |      |    | 20 |
| Juvenile minnow        | <i>Gobiocypris rarus</i>       | Sex ratio                    | 42              | 5       | 25   |    | 20 |
| Larval minnow          | <i>Gobiocypris rarus</i>       | Testes-ova                   | 21              | 25      | 100  |    | 20 |
| Juvenile minnow        | <i>Gobiocypris rarus</i>       | The development of gonads    | 42              | 25      | 100  |    | 20 |
| Cladoceran             | <i>Diaphanosoma celebensis</i> | Reproduction                 | 3G <sup>f</sup> | 1000    |      |    | 21 |
| Japanese medaka        | <i>Oryzias latipes</i>         | Body weight                  | 90              | 10      | 100  |    | 22 |
| Japanese medaka        | <i>Oryzias latipes</i>         | Testes-ova                   | 90              | 0.4     | 4    |    | 22 |
| Japanese medaka        | <i>Oryzias latipes</i>         | Sex ratio                    | 100             | 75      | 150  |    | 22 |
| Japanese medaka        | <i>Oryzias latipes</i>         | Total length                 | 90              | 100     | 1000 |    | 22 |
| Male fathead minnow    | <i>Pimephales promelas</i>     | Gonad weight                 | 21              | 100     | 320  | 32 | 23 |
| rotifer                | <i>B. calyciflorus.</i>        | Reproduction                 | 4               | 10000   |      |    | 24 |
| sand goby              | <i>Pomatoschistus minutus</i>  | Egg production               | 7               | 4       | 97   |    | 25 |
| Medaka                 | <i>Oryzias latipes</i>         | Body weight of F0            | 60              | 0.939   | 2.86 |    | 26 |
| Medaka                 | <i>Oryzias latipes</i>         | Embryological                | 98-100          | 8.66    |      |    | 26 |

|                       |                            |                               |        |       |      |       |    |
|-----------------------|----------------------------|-------------------------------|--------|-------|------|-------|----|
|                       |                            | abnormalities of F1           |        |       |      |       |    |
| Medaka                | <i>Oryzias latipes</i>     | Female GSI of F0              | 71-100 | 27.9  |      |       | 26 |
| Medaka                | <i>Oryzias latipes</i>     | Fertility of F0               | 71-100 | 2.86  | 8.66 | 0.939 | 26 |
| Medaka                | <i>Oryzias latipes</i>     | Male GSI of F0                | 71-100 | 8.66  | 27.9 | 2.86  | 26 |
| Medaka                | <i>Oryzias latipes</i>     | sex ratio of F1               | 56     | 2.86  | 8.66 |       | 26 |
| Medaka                | <i>Oryzias latipes</i>     | sex ratio of F0               | 60     | 8.66  | 27.9 |       | 26 |
| Medaka                | <i>Oryzias latipes</i>     | Testis-ova of F0              | 60     | 8.66  | 27.9 |       | 26 |
| Medaka                | <i>Oryzias latipes</i>     | Total length of F0            | 60     | 0.939 | 2.86 |       | 26 |
| Medaka                | <i>Oryzias latipes</i>     | Total number of eggs from F0  | 71-100 | 8.66  | 27.9 |       | 26 |
| Male zebrafish        | <i>Danio rerio</i>         | GSI                           | 21     | >85.9 |      | 24.5  | 27 |
| Female zebrafish      | <i>Danio rerio</i>         | GSI                           | 21     | >85.9 |      | 24.5  | 27 |
| Male medaka           | <i>Oryzias latipes</i>     | GSI                           | 21     | >85.1 |      | <8.94 | 27 |
| Female medaka         | <i>Oryzias latipes</i>     | GSI                           | 21     | >85.1 |      | 28.2  | 27 |
| Male medaka           | <i>Oryzias latipes</i>     | Number of papillary processes | 21     | >85.1 |      |       | 27 |
| Male fathead minnow   | <i>Pimephales promelas</i> | GSI                           | 21     | >86   |      | 28.6  | 27 |
| Female fathead minnow | <i>Pimephales promelas</i> | GSI                           | 21     | >86   |      | 8.77  | 27 |
| Male fathead minnow   | <i>Pimephales promelas</i> | Number of nuptial tubercles   | 21     | 28.6  | 86   |       | 27 |

159 <sup>a</sup> No observed effect concentration; <sup>b</sup> Lowest observed effect concentration; <sup>c</sup> VTG, vitellogenin, only for fish study; <sup>d</sup> ER, estrogen  
 160 receptor; <sup>e</sup> Gonadosomatic index; <sup>f</sup> three generations.

161 **Table S5**

162  $K_{oc}$  values of seven target compounds

| Compound <sup>a</sup> | $K_{oc}$ <sup>b</sup> |
|-----------------------|-----------------------|
| 4-t-OP                | 18200                 |
| 4-NP                  | 38900                 |
| BPA                   | 778                   |
| E1                    | 4882                  |
| DES                   | 569200                |
| E2                    | 4360                  |
| EE2                   | 4840                  |

163 <sup>a</sup> 4-t-OP: 4-*tert*-octylphenol; 4-NP: 4-nonylphenol; BPA: bisphenol-A; E1: estrone; E2: estradiol;  
164 DES: diethylstilbestrol; EE2: 17 $\alpha$ -Ethinylestradiol. <sup>b</sup>  $K_{oc}$ : organic carbon partitioning coefficient  
165 to E2, data from Reference 28 and Reference 29.

166



167 **Table S6**

168 **Estrogenic equivalent factor of seven target compounds**

| Compound <sup>a</sup> | EEF <sup>b</sup> |
|-----------------------|------------------|
| 4-t-OP                | 0.00093          |
| 4-NP                  | 0.00063          |
| BPA                   | 0.00011          |
| E1                    | 0.3              |
| DES                   | 0.83             |
| E2                    | 1.0              |
| EE2                   | 2.2              |

169 <sup>a</sup> 4-t-OP: 4-*tert*-octylphenol; 4-NP: 4-nonylphenol; BPA: bisphenol-A; E1: estrone; E2: estradiol;  
170 DES: diethylstilbestrol; EE2: 17 $\alpha$ -Ethinylestradiol. <sup>b</sup> EEF: estrogenic equivalent factor relative to  
171 E2.  
172

173 **Table S7**

174 Flow rates of effluents and different river reaches in the Pearl River system, river reaches information and dilution factors of effluents,  
 175 the Liuxi River and Shijing River relative to the Zhujiang River.

| Site  | Inhabitants serviced                  | Location | Flow (m <sup>3</sup> /s) |                   | Dilution factor <sup>a</sup> |            |      |
|-------|---------------------------------------|----------|--------------------------|-------------------|------------------------------|------------|------|
|       |                                       |          | Dry season               | Wet season        | Dry season                   | Wet season |      |
| WWTP  | Datansha (W1)                         | 1500000  | West channel             | 6.4 <sup>b</sup>  | 6.4                          | 27.5       | 154  |
|       | Liede (W2)                            | 2150000  | Front channel            | 7.4               | 7.4                          | 23.6       | 132  |
|       | Xilang (W3)                           | 600000   | Back channel             | 4.6               | 4.6                          | 17.3       | 86.4 |
|       | Lijiao (W4)                           | 1350000  | Back channel             | 2.3               | 2.3                          | 43.5       | 244  |
| River | Liuxi River (S1)                      | -        | -                        | 17.3 <sup>c</sup> | 156 <sup>c</sup>             | 16.2       | 5.8  |
|       | Shijing River (S14)                   | -        | -                        | 3.5 <sup>d</sup>  | 5.7 <sup>d</sup>             | 80.0       | 158  |
|       | Zhujiang River (West channel, S4, S5) | -        | -                        | 280 <sup>c</sup>  | 900 <sup>c</sup>             | -          | -    |
|       | Zhujiang River (Front channel, S7)    | -        | -                        | 175 <sup>c</sup>  | 980 <sup>c</sup>             | -          | -    |
|       | Zhujiang River (Back channel, S8)     | -        | -                        | 200 <sup>c</sup>  | 1120 <sup>c</sup>            | -          | -    |

176 <sup>a</sup> Dilution factor is defined as the ratio of the flow of effluent or river versus the flow of Zhujiang River.

177 <sup>b</sup> All of the STP effluent flow data were obtained from Guangzhou Sewage Treatment Co., Ltd.

178 <sup>c</sup> Data were provided by Guangdong Hydrology Bureau.
